# Supplementary material for: Genomic Characterization of a Relative of Mumps Virus in Lesser Dawn Bats of Southeast Asia
Source: Viruses. 2023 Feb 28;15(3):659. doi: 10.3390/v15030659 (PMC10053730; doi:10.3390/v15030659)
Supplement: Supplementary file 1 [file viruses-15-00659-s001.zip › Supplemental Table S1.xlsx]

## Sheet: DbPV_ref_contigs
Query sequence	BlastX Hit	Description	E-value	Bit score	%Identity	%Gaps	Notes
MT506196 (1..281) consensus	QWT89933	nucleocapsid protein [Mumps virus genotype D]	2.36e-53	184.88	92.47	0
MT506196 (331..1418) consensus	UCZ36886	nucleocapsid protein [Mumps virus genotype G]	0	548.51	94.74	0
MT506196 (2447..4039) consensus	YP_009505444	matrix protein [Bat Paramyxovirus Epo_spe/AR1/DRC/2009] >gb|AFH96014.1| matrix protein [Bat Paramyxovirus Epo_spe/AR1/DRC/2009]	5.2e-179	519.24	76.38	0	sequence predicted to span P and M genes
MT506196 (4044..4391) consensus	YP_009505444	matrix protein [Bat Paramyxovirus Epo_spe/AR1/DRC/2009] >gb|AFH96014.1| matrix protein [Bat Paramyxovirus Epo_spe/AR1/DRC/2009]	6.65e-22	99.75	75	0
MT506196 (4482..4907) consensus	ANN24083	fusion protein [Mumps orthorubulavirus]	4.19e-24	108.23	68.09	0
MT506196 (5322..7072) consensus	ARX80570	fusion protein, partial [Mumps virus genotype G]	5.43e-87	286.96	58.04	0	sequence includes SH gene
MT506196 (7263..7559) consensus	AAT42232	hemagglutinin-neuraminidase, partial [Mumps orthorubulavirus]	1.17e-41	144.82	63.27	0
MT506196 (7589..8135) consensus	YP_009505446	hemagglutinin-neuraminidase protein [Bat Paramyxovirus Epo_spe/AR1/DRC/2009] >gb|AFH96016.1| hemagglutinin-neuraminidase protein [Bat Paramyxovirus Epo_spe/AR1/DRC/2009]	1.5e-76	250.37	63.54	0
MT506196 (8173..8804) consensus	BAK26776	large protein, partial [Mumps orthorubulavirus]	6.75e-65	214.16	64.29	0
MT506196 (9157..9717) consensus	ACJ11212	large protein [Mumps orthorubulavirus]	3.62e-103	337.42	83.33	0
MT506196 (9725..9956) consensus	YP_009505447	large protein [Bat Paramyxovirus Epo_spe/AR1/DRC/2009] >gb|AET43305.1| large protein [Bat Paramyxovirus Epo_spe/AR1/DRC/2009]	1.47e-38	146.75	85.71	0
MT506196 (10167..10945) consensus	BBA66890	large protein, partial [Mumps orthorubulavirus]	1.86e-154	480.71	86.1	0
MT506196 (11154..11744) consensus	AQN78530	large protein [Mumps virus genotype G] >gb|AUZ98365.1| large protein [Mumps virus genotype G]	3.76e-106	346.28	89.29	0
MT506196 (11784..12007) consensus	BBA66890	large protein, partial [Mumps orthorubulavirus]	5.93e-39	147.9	86.49	0
MT506196 (12205..12420) consensus	UCZ38685	large polymerase protein [Mumps virus genotype G]	9.76e-35	135.58	88.73	0
MT506196 (12741..12992) consensus	QJD56099	large protein [Mumps orthorubulavirus]	7.77e-43	159.46	85.54	0
MT506196 (13194..13675) consensus	YP_009505447	large protein [Bat Paramyxovirus Epo_spe/AR1/DRC/2009] >gb|AET43305.1| large protein [Bat Paramyxovirus Epo_spe/AR1/DRC/2009]	2.26e-64	224.94	65.62	0
MT506196 (13910..15172) consensus	YP_009505447	large protein [Bat Paramyxovirus Epo_spe/AR1/DRC/2009] >gb|AET43305.1| large protein [Bat Paramyxovirus Epo_spe/AR1/DRC/2009]	0	568.54	69.64	1.02
